# Supplementary material for: Rationalization of Activity Cliffs of a Sulfonamide Inhibitor of DNA Methyltransferases with Induced-Fit Docking
Source: Int J Mol Sci. 2014 Feb 21;15(2):3253–61. doi: 10.3390/ijms15023253 (PMC3958909; doi:10.3390/ijms15023253)

## Supplementary Information

**Figure S1.** Comparison of the induced-fit poses predicted for **SW155246** (carbon atoms in green), **SW155246-1** (carbon atoms in pink) and **SW155246-2** (carbon atoms in light blue). The co-crystal sinefungin (carbon atoms in yellow) is shown for reference. Hydrogen bonds between **SW155246** and the protein are shown in dashed pink lines.

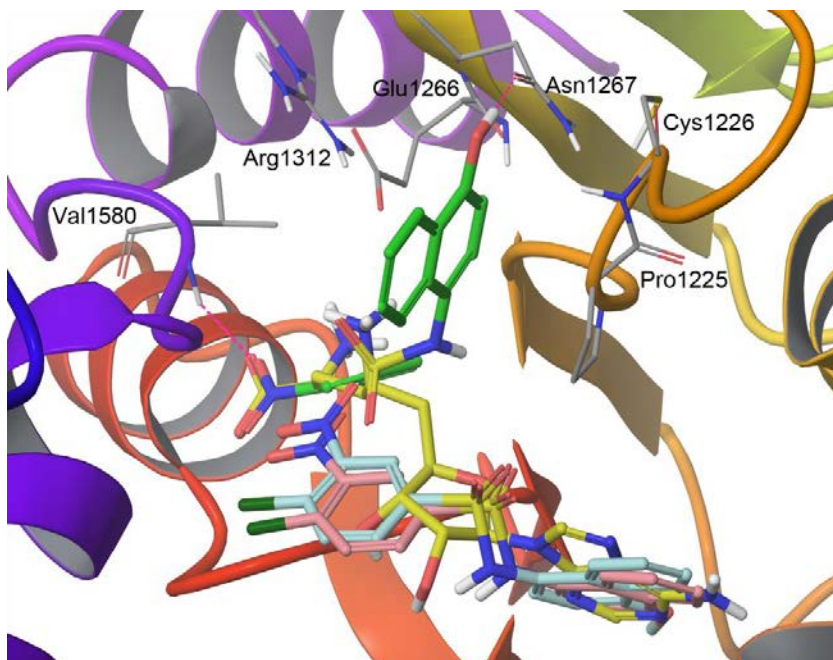

**Figure S2.** Predicted binding mode for **SW155246** with induced-fit docking (carbon atoms in light green) and regular docking (carbon atoms in dark green).

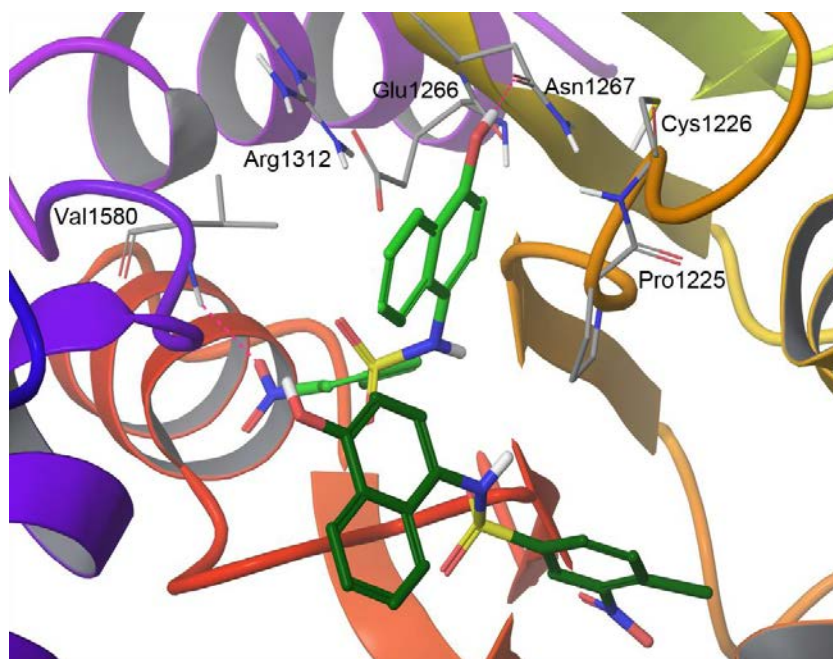

Supplement: Supplementary file 1 [file ijms-15-03253-s001.pdf]
